# Supplementary material
Source: PubMed Central journal article supplement (PMC7211121)
Supplement: NIHMS1581844-supplement-Supplementary_tables_and_figures.pdf [file NIHMS1581844-supplement-Supplementary_tables_and_figures.pdf]

## 1 **Supplementary information**

### 2 **Screening assay**

3 Two drug libraries were screened at a fixed concentration of 16  $\mu$ M against one strain of *C. difficile*  
4 (*C. difficile* NAP07) to identify active compounds. Briefly, bacteria were streaked on  
5 supplemented brain heart infusion (BHIS) agar plates and incubated anaerobically at 37 °C for 48  
6 hours. Colonies were scraped off the agar plates, suspended in PBS and diluted in BHIS broth at  
7 a concentration of about  $5 \times 10^5$  CFU/mL. Compounds, at a concentration of 16  $\mu$ M, were mixed  
8 with the bacterial suspension in 96-well plates and incubated anaerobically for 48 hours at 37 °C.  
9 Drugs that inhibited bacterial growth visually were considered as hits.

### 10 **Supplementary Table 1: Active drugs from Pharmakon library**

|    | <b>Compound name</b>         | <b>Indication</b> |
|----|------------------------------|-------------------|
| 1  | Amoxicillin                  | Antibacterial     |
| 2  | Bacitracin                   | Antibacterial     |
| 3  | Carbenicillin disodium       | Antibacterial     |
| 4  | Demeclocycline hydrochloride | Antibacterial     |
| 5  | Furazolidone                 | Antibacterial     |
| 6  | Fusidic acid                 | Antibacterial     |
| 7  | Gramicidin                   | Antibacterial     |
| 8  | Hetacillin potassium         | Antibacterial     |
| 9  | Minocycline hydrochloride    | Antibacterial     |
| 10 | Nafcillin sodium             | Antibacterial     |
| 11 | Oxytetracycline              | Antibacterial     |
| 12 | Penicillin g potassium       | Antibacterial     |
| 13 | Penicillin v potassium       | Antibacterial     |
| 14 | Piperacillin sodium          | Antibacterial     |
| 15 | Vancomycin hydrochloride     | Antibacterial     |
| 16 | Flumequine                   | Antibacterial     |
| 17 | Methacycline hydrochloride   | Antibacterial     |
| 18 | Meclocycline sulfosalicylate | Antibacterial     |
| 19 | Monensin sodium              | Antibacterial     |
| 20 | Marbofloxacin                | Antibacterial     |
| 21 | Linezolid                    | Antibacterial     |
| 22 | Clinafoxacin hydrochloride   | Antibacterial     |
| 23 | Azlocillin sodium            | Antibacterial     |
| 24 | Bacampicillin hydrochloride  | Antibacterial     |
| 25 | Thiamphenicol                | Antibacterial     |
| 26 | Lasalocid sodium             | Antibacterial     |

|    |                                  |                                                |
|----|----------------------------------|------------------------------------------------|
| 27 | Cefpiramide                      | Antibacterial                                  |
| 28 | Levofloxacin                     | Antibacterial                                  |
| 29 | Moxifloxacin hydrochloride       | Antibacterial                                  |
| 30 | Enrofloxacin                     | Antibacterial                                  |
| 31 | Thiostrepton                     | Antibacterial                                  |
| 32 | Gatifloxacin                     | Antibacterial                                  |
| 33 | Sarafloxacin hydrochloride       | Antibacterial                                  |
| 34 | Nithiamide                       | Antibacterial                                  |
| 35 | Florfenicol                      | Antibacterial                                  |
| 36 | Teicoplanin [a(2-1) shown]       | Antibacterial                                  |
| 37 | Gemifloxacin mesylate            | Antibacterial                                  |
| 38 | Nadifloxacin                     | Antibacterial                                  |
| 39 | Pazufloxacin mesylate            | Antibacterial                                  |
| 40 | Clofoctol                        | Antibacterial                                  |
| 41 | Salinomycin, sodium              | Antibacterial                                  |
| 42 | Alexidine hydrochloride          | Antibacterial                                  |
| 43 | Nitroxoline                      | Antibacterial                                  |
| 44 | Nifuroxazide                     | Antibacterial                                  |
| 45 | Chlorhexidine dihydrochloride    | Antibacterial (topical), disinfectant          |
| 46 | Rifampin                         | Antibacterial (tuberculostatic)                |
| 47 | Streptomycin sulfate             | Antibacterial (tuberculostatic)                |
| 48 | Gentian violet                   | Antibacterial, anthelmintic                    |
| 49 | Tetracycline hydrochloride       | Antibacterial, antiamebic, antirickettsial     |
| 50 | Chlortetracycline hydrochloride  | Antibacterial, antiamebic, Calcium chelator,   |
| 51 | Pyrithione zinc                  | Antibacterial, antifungal, antiseborrheic      |
| 52 | Clofazimine                      | Antibacterial, antilepreptic, antituberculosis |
| 53 | Chloramphenicol palmitate        | Antibacterial, antirickettsial                 |
| 54 | Chloramphenicol sodium succinate | Antibacterial, antirickettsial                 |
| 55 | Chloramphenicol                  | Antibacterial, antirickettsial                 |
| 56 | Narasin                          | Antibacterial, antiviral                       |
| 57 | Nitromide                        | Antibacterial, coccidiostat                    |
| 58 | Difloxacin hydrochloride         | Antibacterial, dna gyrase inhibitor            |
| 59 | Rifaximin                        | Antibacterial, rna synthesis inhibitor         |
| 60 | Dihydrostreptomycin              | Antibacterial, tuberculostatic                 |
| 61 | Doxycycline hydrochloride        | Antibacterial                                  |
| 62 | Methicillin sodium               | Antibacterial                                  |
| 63 | Cetrimonium bromide              | Antiinfective                                  |
| 64 | Methylbenzethonium chloride      | Antiinfective                                  |
| 65 | Triclosan                        | Antiinfective                                  |
| 66 | Benzethonium chloride            | Antiinfective (topical)                        |
| 67 | Cetylpyridinium chloride         | Antiinfective (topical)                        |
| 68 | Hexachlorophene                  | Antiinfective (topical)                        |
| 69 | Nitrofurazone                    | Antiinfective (topical)                        |
| 70 | Thonzonium bromide               | Mucolytic, antibacterial, surface active agent |
| 71 | Sanguinarium chloride            | Antineoplastic, antiplaque agent               |
| 72 | Bithionate sodium                | Anthelmintic, antiseptic                       |
| 73 | Norgestimate                     | Progestin                                      |
| 74 | Clotrimazole                     | Antifungal                                     |

|     |                              |                                                  |
|-----|------------------------------|--------------------------------------------------|
| 75  | Diethylstilbestrol           | Estrogen                                         |
| 76  | Estradiol valerate           | Estrogen                                         |
| 77  | Methylprednisolone           | Antiinflammatory, glucocorticoid                 |
| 78  | Methylthiouracil             | Antithyroid agent                                |
| 79  | Metoclopramide hydrochloride | Antiemetic                                       |
| 80  | Metoprolol tartrate          | Antihypertensive, antianginal                    |
| 81  | Metronidazole                | Anthelmintic                                     |
| 82  | Miconazole nitrate           | Antifungal (topical)                             |
| 83  | Chloroquine diphosphate      | Anthelmintic, antirheumatic, intercalating agent |
| 84  | Phenylmercuric acetate       | Antifungal, antimicrobial                        |
| 85  | Proglumide                   | Anticholinergic                                  |
| 86  | Sulconazole nitrate          | Antifungal                                       |
| 87  | Ronidazole                   | Anthelmintic                                     |
| 88  | Econazole nitrate            | Antifungal                                       |
| 89  | Tretinoin                    | Keratolytic, antiacne, antineoplastic            |
| 90  | Tinidazole                   | Anthelmintic                                     |
| 91  | Nifursol                     | Anthelmintic                                     |
| 92  | Diclazuril                   | Coccidiostat                                     |
| 93  | Chloroxine                   | Chelating agent, antiseborrheic                  |
| 94  | Niclosamide                  | Anthelmintic, teniacide                          |
| 95  | Benzalkonium chloride        | Preservative                                     |
| 96  | Nitazoxanide                 | Anthelmintic                                     |
| 97  | Prednicarbate                | Antiinflammatory, glucocorticoid                 |
| 98  | Teniposide                   | Antineoplastic                                   |
| 99  | Butoconazole                 | Antifungal                                       |
| 100 | Bifonazole                   | Antifungal, calmodulin antagonist                |
| 101 | Oxiconazole nitrate          | Antifungal                                       |
| 102 | Tioconazole                  | Antifungal                                       |
| 103 | Benzbromarone                | Uricosuric                                       |
| 104 | Ornidazole                   | Anthelmintic                                     |
| 105 | Toremifene citrate           | Antineoplastic, anti-estrogen                    |
| 106 | Dichlorophen                 | Anthelmintic                                     |
| 107 | Broxaldine                   | Anthelmintic, antifungal                         |
| 108 | Secnidazole                  | Anthelmintic, antitrichomonas                    |
| 109 | Oxyclozanide                 | Anthelmintic                                     |
| 110 | Triclabendazole              | Anthelmintic                                     |
| 111 | Dimetridazole                | Anthelmintic                                     |

11

12 **Supplementary Table 2: Active drugs from Johns Hopkins library**

|   | <b>Name</b>               | <b>Indication</b> |
|---|---------------------------|-------------------|
| 1 | Potash, sulfurated        | Antibacterial     |
| 2 | Pyrrithione zinc          | Antibacterial     |
| 3 | Acriflavine hydrochloride | Antibacterial     |
| 4 | Bismuth tribromophenate   | Antibacterial     |
| 5 | Chloramine-t hydrate      | Antibacterial     |
| 6 | Chlorquinaldol            | Antibacterial     |

|    |                                                  |                                              |
|----|--------------------------------------------------|----------------------------------------------|
| 7  | Dapsone                                          | Antibacterial                                |
| 8  | Fenticlor                                        | Antibacterial                                |
| 9  | Diclazuril                                       | Antibacterial                                |
| 10 | Carbadox                                         | Antibacterial                                |
| 11 | Cloxyquin                                        | Antibacterial                                |
| 12 | Dihydrostreptomycin, dihydrostreptomycin sulfate | Antibacterial                                |
| 13 | Ornidazole                                       | Antibacterial                                |
| 14 | Nebramycin                                       | Antibacterial                                |
| 15 | Domiphen bromide                                 | Antibacterial (topical)                      |
| 16 | Cetalkonium chloride                             | Antibacterial (topical)                      |
| 17 | Clioquinol                                       | Antibacterial (topical)                      |
| 18 | Nifuroxime                                       | Antibacterial (topical)                      |
| 19 | Rifampicin (rifampin)                            | Antibacterial (tuberculostatic)              |
| 20 | 3-formyl rifamycin                               | Antibacterial (tuberculostatic)              |
| 21 | Clofazimine                                      | Antibacterial (tuberculostatic, leprostatic) |
| 22 | Amikacin                                         | Antibiotic                                   |
| 23 | Benzoylpenicillin calcium                        | Antibiotic                                   |
| 24 | Carbenicillin                                    | Antibiotic                                   |
| 25 | Cefpiramide                                      | Antibiotic                                   |
| 26 | Daptomycin                                       | Antibiotic                                   |
| 27 | Chloramphenicol                                  | Antibiotic                                   |
| 28 | Gatifloxacin                                     | Antibiotic                                   |
| 29 | Doxycycline                                      | Antibiotic                                   |
| 30 | Doxycycline hyclate                              | Antibiotic                                   |
| 31 | Meclocycline sulfosalicylate salt                | Antibiotic                                   |
| 32 | Mezlocillin sodium                               | Antibiotic                                   |
| 33 | Kanamycin                                        | Antibiotic                                   |
| 34 | Levofloxacin hcl                                 | Antibiotic                                   |
| 35 | Linezolid                                        | Antibiotic                                   |
| 36 | Meclocycline                                     | Antibiotic                                   |
| 37 | Nitrofurazone                                    | Antibiotic                                   |
| 38 | Minocycline                                      | Antibiotic                                   |
| 39 | Minocycline hydrochloride salt                   | Antibiotic                                   |
| 40 | Moxifloxacin hcl                                 | Antibiotic                                   |
| 41 | Nafcillin sodium salt monohydrate                | Antibiotic                                   |
| 42 | Nitrofurantoin                                   | Antibiotic                                   |
| 43 | Penicillin g                                     | Antibiotic                                   |
| 44 | Penicillin g (procaine salt)                     | Antibiotic                                   |
| 45 | Penicillin g potassium                           | Antibiotic                                   |
| 46 | Penicillin v potassium                           | Antibiotic                                   |
| 47 | Piperacillin-tazobactam                          | Antibiotic                                   |
| 48 | Cefamandole                                      | Antibiotic                                   |
| 49 | Cefoxitin                                        | Antibiotic                                   |
| 50 | Cefepime hydrochloride                           | Antibiotic                                   |

|    |                                                                |            |
|----|----------------------------------------------------------------|------------|
| 51 | Cefixime                                                       | Antibiotic |
| 52 | Cefoperazone sodium salt                                       | Antibiotic |
| 53 | Ceforanide                                                     | Antibiotic |
| 54 | Tetracycline                                                   | Antibiotic |
| 55 | Vancomycin hcl hydrate                                         | Antibiotic |
| 56 | Florfenicol                                                    | Antibiotic |
| 57 | Clinafloxacin hcl                                              | Antibiotic |
| 58 | Clofoctol                                                      | Antibiotic |
| 59 | Dibekacin                                                      | Antibiotic |
| 60 | Rifamycin sv                                                   | Antibiotic |
| 61 | Rifaximin                                                      | Antibiotic |
| 62 | Metampicillin                                                  | Antibiotic |
| 63 | Nitroxoline                                                    | Antibiotic |
| 64 | Pazufloxacin                                                   | Antibiotic |
| 65 | Penimepicycline                                                | Antibiotic |
| 66 | Pipemidic acid                                                 | Antibiotic |
| 67 | Tosufloxacin                                                   | Antibiotic |
| 68 | Sarafloxacin hcl                                               | Antibiotic |
| 69 | Thiamphenicol                                                  | Antibiotic |
| 70 | Thiostrepton                                                   | Antibiotic |
| 71 | Amoxicillin                                                    | Antibiotic |
| 72 | Chlortetracycline, chlortetracycline hydrochloride             | Antibiotic |
| 73 | Dicloxacillin, dicloxacillin sodium, dicloxacillin sodium salt | Antibiotic |
| 74 | Monensin, monensin sodium salt                                 | Antibiotic |
| 75 | Brilliant green                                                | Antiseptic |
| 76 | 5-chlorosalicylanilide                                         | Antiseptic |
| 77 | Ammonium citrate (ammonium hydrogencitrate)                    | Antiseptic |
| 78 | Castile soap                                                   | Antiseptic |
| 79 | Cetylpyridinium                                                | Antiseptic |
| 80 | Cetylpyridinium bromide monohydrate                            | Antiseptic |
| 81 | Chlorhexidine gluconate                                        | Antiseptic |
| 82 | Methylbenzethonium chloride                                    | Antiseptic |
| 83 | Methyl Dopate hydrochloride                                    | Antiseptic |
| 84 | Sodium iodate                                                  | Antiseptic |
| 85 | Tetradecyl sulfate, sodium salt                                | Antiseptic |
| 86 | Thonzonium bromide                                             | Antiseptic |
| 87 | Triclosan                                                      | Antiseptic |
| 88 | Benzododecinium chloride                                       | Antiseptic |
| 89 | Pidolic acid                                                   | Antiseptic |
| 90 | Trilocarban (3,4,4'-trichlorocarbanilide, 99%)                 | Antiseptic |
| 91 | Bithionol                                                      | Antiseptic |
| 92 | Gentian violet                                                 | Antiseptic |
| 93 | Benzethonium chloride                                          | Antiseptic |
| 94 | Benzalkonium chloride                                          | Antiseptic |

|     |                                       |                                            |
|-----|---------------------------------------|--------------------------------------------|
| 95  | Bithionoloxide                        | Anthelmintic bithionol                     |
| 96  | Dichlorophene                         | Anthelmintic (cestodes)                    |
| 97  | Dithiazanine iodide                   | Anthelmintic (nematodes)                   |
| 98  | Closantel                             | Anthelmintic.                              |
| 99  | Tinidazole                            | Antiprotozoal                              |
| 100 | Ronidazole                            | Antiprotozoal                              |
| 101 | Nifursol                              | Antiprotozoal (poultry)                    |
| 102 | Metronidazole                         | Antiprotozoal (trichomonas)                |
| 103 | Nithiamide                            | Antiprotozoal (trichomonas).               |
| 104 | Benznidazole                          | Antiprotozoal (trypanosoma)                |
| 105 | Secnidazole                           | Antiamebic                                 |
| 106 | Oxiconazole nitrate                   | Antifungal                                 |
| 107 | Clotrimazole                          | Antifungal                                 |
| 108 | Econazole                             | Antifungal                                 |
| 109 | Sulconazole                           | Antifungal                                 |
| 110 | Butoconazole nitrate                  | Antifungal (topical)                       |
| 111 | Miconazole                            | Antifungal (topical)                       |
| 112 | Tioconazole                           | Antifungal (topical)                       |
| 113 | Alprenolol, alprenolol hydrochloride  | Antihypertensive                           |
| 114 | Quinaldine blue (pinacyanol chloride) | Antineoplastic                             |
| 115 | Puromycin                             | Antineoplastic                             |
| 116 | Rose bengal                           | Diagnostic aid (corneal trauma indicator). |

13

14

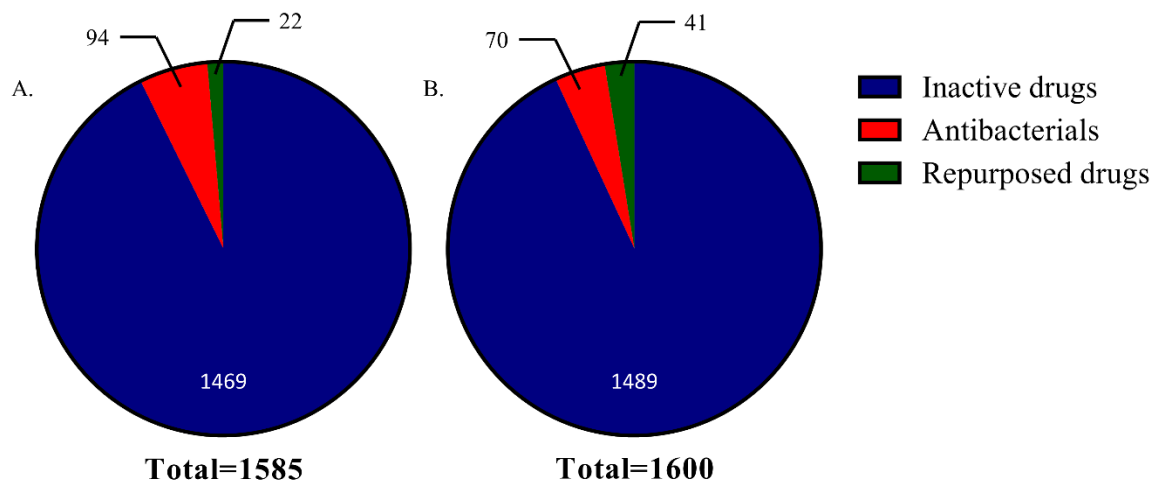

15  
 16 **Supplementary Figure 1: Anticlostridial activity of drugs in Johns Hopkins and**  
 17 **Pharmakon drug libraries.** Both Johns Hopkins (A) and Pharmakon (B) Libraries were  
 18 screened against a single strain of *C. difficile* (Strain NAP07) at a concentration of 16  $\mu$  M.  
 19 Active drugs were divided into two classes; drugs with known antibacterial activity (red) and  
 20 repurposed drugs (green). Repurposed drugs from both libraries were combined for further  
 21 testing.  
 22
